# Supplementary material for: Interactive network of the dehydrogenation of alkanes, alkenes and alkynes – surface carbon hydrogenative coupling on Ru(111)
Source: Royal Society of Chemistry journal article supplement (doi:10.1039/d0cy02055a), 2020-11-03
Supplement: d0cy02055a1.pdf [file d0cy02055a1.pdf]

## Interactive network of the dehydrogenation of alkanes, alkenes and alkynes – surface carbon hydrogenative coupling on Ru(111)

Yueyue Jiao<sup>a,b,c</sup>, Huan Ma<sup>a,b,c</sup>, Hui Wang<sup>a,b,c</sup>, Yong-Wang Li<sup>a,b,c,d</sup>, Xiao-Dong Wen<sup>\*a,b,c,d</sup>, and Haijun Jiao<sup>\*e</sup>

(a) State Key Laboratory of Coal Conversion, Institute of Coal Chemistry, Chinese Academy of Sciences, Taiyuan 030001, P.R. China. (b) The University of Chinese Academy of Sciences, Beijing 100049, P.R. China. (c) National Energy Center for Coal to Liquids, Synfuels China Co., Ltd., Beijing 101400, P.R. China. (d) Beijing Advanced Innovation Center for Materials Genome Engineering, Industry-University Cooperation Base between Beijing Information S&T University and Synfuels China Co. Ltd, Beijing, China. (e) Leibniz-Institut für Katalyse e.V. an der Universität Rostock, Albert-Einstein Strasse 29a, 18059 Rostock, Germany: E-mails: [wxd@sxicc.ac.cn](mailto:wxd@sxicc.ac.cn); and [Haijun.jiao@catalysis.de](mailto:Haijun.jiao@catalysis.de)

**Table S1.** A comparison of the adsorption energy (eV) of CO\*, CH<sub>4</sub>\*, CH<sub>3</sub>CH<sub>3</sub>\*, CH<sub>3</sub>CH<sub>2</sub>CH<sub>3</sub>\*, CH<sub>3</sub>\*, CH<sub>3</sub>CH<sub>2</sub>\*, and CH<sub>3</sub>CH<sub>2</sub>CH<sub>2</sub>\* on Ru(111) surface, and CO\* on Ru(0001) surface calculated by rPBE and PBE functionals with/without D<sub>3</sub> correction.

|                                                 | rPBE  | rPBE+ZPE | rPBE+ZPE+D <sub>3</sub> | PBE <sup>a</sup> | PBE+ZPE | PBE+ZPE+D <sub>3</sub> |
|-------------------------------------------------|-------|----------|-------------------------|------------------|---------|------------------------|
| Ru(0001)                                        |       |          |                         |                  |         |                        |
| CO                                              | -1.70 | -1.66    | -2.00                   | -1.94            | -1.89   | -2.23                  |
| Ru(111)                                         |       |          |                         |                  |         |                        |
| CO                                              | -1.83 | -1.77    | -2.06                   | -2.07            | -2.00   | -2.40                  |
| CH <sub>4</sub>                                 | 0     | 0.04     | -0.05                   | -0.02 [-0.02]    | -0.01   | -0.17                  |
| CH <sub>3</sub> CH <sub>3</sub>                 | 0.01  | 0.03     | -0.15                   | -0.02[-0.03]     | -0.03   | -0.36                  |
| CH <sub>3</sub> CH <sub>2</sub> CH <sub>3</sub> | 0.01  | 0.04     | -0.21                   | -0.04            | -0.06   | -0.35                  |
| CH <sub>3</sub>                                 | -1.77 | -1.68    | -2.11                   | -2.22[-2.05]     | -2.13   | -2.67                  |
| CH <sub>3</sub> CH <sub>2</sub>                 | -1.35 | -1.26    | -1.90                   | -1.83[-1.76]     | -1.76   | -2.48                  |
| CH <sub>3</sub> CH <sub>2</sub> CH <sub>2</sub> | -1.31 | -1.27    | -2.03                   | -1.84            | -1.77   | -2.66                  |

(a) PBE *p*(2x2) Ru(0001) results from Ref<sup>1</sup> are given in square bracket.

**Table S2.** Zero point energy (ZPE) effect on the energy barriers and reaction energies of the minimum energy path of CH<sub>4</sub> successive dissociation on the Ru(111) surface.  $d_{\text{Ru-C}}$  and  $d_{\text{Ru-H}}$  respectively for the distance between the top layer Ru atoms and the closet C atom and H atom (the values of  $d_{\text{Ru-C}}$  and  $d_{\text{Ru-H}}$  greater than 2.5 Å are not listed),  $d_{\text{breaking}}$  for the length of the breaking bond in transition states.

| Reactions                            | E <sub>a</sub> (eV) | E <sub>r</sub> (eV) | E <sub>a</sub> (ZPE) (eV) | E <sub>r</sub> (ZPE) (eV) | E <sub>a</sub> (G)(eV) | ΔG(eV) | $d_{\text{Ru-C}}$ (Å) | $d_{\text{Ru-H}}$ (Å) | $d_{\text{breaking}}$ (Å) |
|--------------------------------------|---------------------|---------------------|---------------------------|---------------------------|------------------------|--------|-----------------------|-----------------------|---------------------------|
| CH <sub>4</sub> ⇌ CH <sub>3</sub> +H | 1.03                | 0.21                | 0.88                      | 0.02                      | 0.95                   | 0.19   | 2.284                 | 1.678                 | 1.606                     |
| CH <sub>3</sub> ⇌ CH <sub>2</sub> +H | 0.33                | -0.32               | 0.20                      | -0.45                     | 0.23                   | -0.41  | 2.102; 2.129; 2.229   | 1.672                 | 1.571                     |
| CH <sub>2</sub> ⇌ CH+H               | 0.07                | -0.62               | -0.03                     | -0.68                     | -0.03                  | -0.66  | 2.057; 2.057; 2.062   | 1.675                 | 1.491                     |
| CH ⇌ C+H                             | 1.01                | 0.30                | 0.90                      | 0.22                      | 0.93                   | 0.21   | 1.947; 1.950; 1.974   | 1.676                 | 1.654                     |

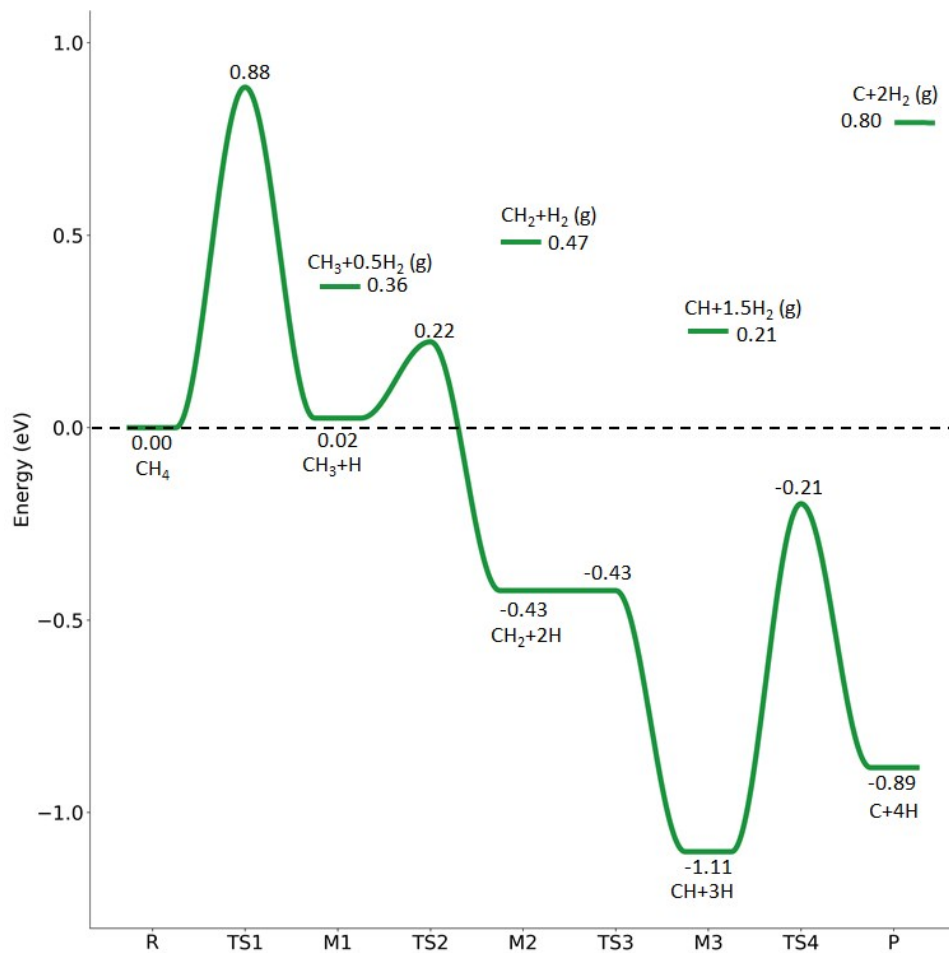

**Figure S1.** Potential energy surface of CH<sub>4</sub>\* consecutive C-H dissociation (energy level on the basis of adsorbed CH<sub>4</sub>\*); and the energy level of surface carbonaceous species and gaseous H<sub>2</sub> is also given for comparison.

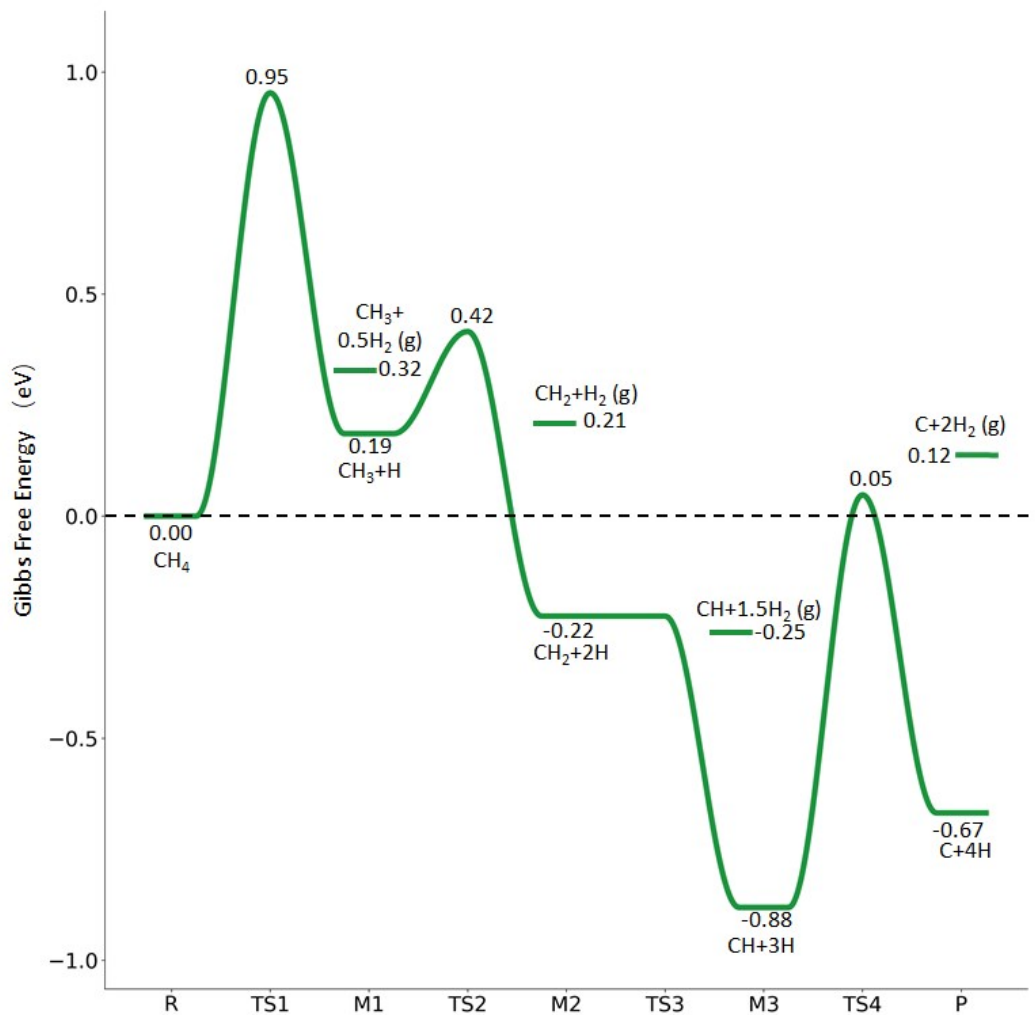

**Figure S2.** Gibbs free energy profiles of methane dehydrogenation at 490 K and 19.7 atm H<sub>2</sub> (energy level on the basis of adsorbed CH<sub>4</sub>\*); and the energy level of surface carbonaceous species and gaseous H<sub>2</sub> is also given for comparison.

**Table S3.** Zero point energy (ZPE) effect on the energy barriers and reaction energies of elementary reactions of the minimum energy path of CH<sub>3</sub>CH<sub>3</sub> successive dissociation on the Ru(111) surface.  $d_{\text{Ru-C}}$  and  $d_{\text{Ru-H}}$  respectively for the distance between the top layer Ru atoms and the closet C atom and H atom (the values of  $d_{\text{Ru-C}}$  and  $d_{\text{Ru-H}}$  greater than 2.5 Å are not listed),  $d_{\text{breaking}}$  for the length of the breaking bond in transition states. C<sub>1</sub> and C<sub>2</sub> respectively represent for the two C atoms nearest from the surface.

| Reactions                                                            | $E_a$ (eV) | $E_r$ (eV) | $E_a(\text{ZPE})$ (eV) | $E_r(\text{ZPE})$ (eV) | $E_a(\text{G})$ (eV) | $\Delta G$ (eV) | $d_{\text{Ru-C}}$ (Å)                                                                                                          | $d_{\text{Ru-H}}$ (Å) | $d_{\text{breaking}}$ (Å) |
|----------------------------------------------------------------------|------------|------------|------------------------|------------------------|----------------------|-----------------|--------------------------------------------------------------------------------------------------------------------------------|-----------------------|---------------------------|
| CH <sub>3</sub> CH <sub>3</sub> ⇌ CH <sub>3</sub> CH <sub>2</sub> +H | 1.04       | 0.48       | 0.87                   | 0.25                   | 0.89                 | 0.26            | 2.314                                                                                                                          | 1.656                 | 1.619                     |
| CH <sub>3</sub> CH <sub>3</sub> ⇌ CH <sub>3</sub> +CH <sub>3</sub>   | 2.50       | 0.36       | 2.28                   | 0.10                   | 2.25                 | 0.09            | 2.176 (C <sub>1</sub> ); 2.219 (C <sub>2</sub> )                                                                               |                       | 1.894                     |
| CH <sub>3</sub> CH <sub>2</sub> ⇌ CH <sub>3</sub> CH+H               | 0.09       | -0.63      | 0.00                   | -0.75                  | 0.03                 | -0.74           | 2.137; 2.146; 2.270                                                                                                            | 1.669                 | 1.516                     |
| CH <sub>3</sub> CH <sub>2</sub> ⇌ CH <sub>2</sub> CH <sub>2</sub> +H | 0.19       | -0.40      | 0.10                   | -0.50                  | 0.13                 | -0.49           | 2.224 (C <sub>1</sub> ); 2.227 (C <sub>1</sub> );<br>2.392(C <sub>2</sub> ); 2.391(C <sub>2</sub> )                            | 1.698                 | 1.529                     |
| CH <sub>3</sub> CH <sub>2</sub> ⇌ CH <sub>3</sub> +CH <sub>2</sub>   | 0.86       | -0.42      | 0.78                   | -0.55                  | 0.77                 | -0.51           | 2.074 (C <sub>1</sub> ); 2.332 (C <sub>2</sub> )                                                                               |                       | 2.006                     |
| CH <sub>3</sub> CH ⇌ CH <sub>3</sub> C+H                             | 0.01       | -0.77      | -0.05                  | -0.82                  | -0.01                | -0.82           | 2.080; 2.081; 2.101                                                                                                            | 1.673                 | 1.421                     |
| CH <sub>3</sub> CH ⇌ CH <sub>2</sub> CH+H                            | 0.49       | -0.04      | 0.36                   | -0.21                  | 0.43                 | -0.02           | 2.257                                                                                                                          | 1.683                 | 1.585                     |
| CH <sub>3</sub> CH ⇌ CH <sub>3</sub> +CH                             | 0.96       | -0.36      | 0.93                   | -0.45                  | 0.98                 | -0.41           | 2.053 (C <sub>1</sub> ); 2.346 (C <sub>2</sub> )                                                                               |                       | 1.932                     |
| CH <sub>3</sub> C ⇌ CH <sub>2</sub> C+H                              | 0.69       | 0.22       | 0.56                   | 0.08                   | 0.66                 | 0.16            | 2.292                                                                                                                          | 1.680                 | 1.637                     |
| CH <sub>3</sub> C ⇌ CH <sub>3</sub> +C                               | 1.53       | 0.69       | 1.44                   | 0.58                   | 1.54                 | 0.64            | 1.949 (C <sub>1</sub> ); 2.315 (C <sub>2</sub> )                                                                               |                       | 2.113                     |
| CH <sub>2</sub> C ⇌ CHC+H                                            | 0.90       | 0.11       | 0.74                   | -0.02                  | 0.74                 | -0.01           | 2.199; 2.252                                                                                                                   | 1.728                 | 1.467                     |
| CH <sub>2</sub> C ⇌ CH <sub>2</sub> +C                               | 1.66       | 0.38       | 1.55                   | 0.28                   | 1.60                 | 0.29            | 1.982 (C <sub>1</sub> ); 2.036 (C <sub>2</sub> )                                                                               |                       | 2.068                     |
| CHC ⇌ CC+H                                                           | 1.49       | 0.52       | 1.34                   | 0.42                   | 1.33                 | 0.43            | 1.986; 2.115; 2.119                                                                                                            | 1.713                 | 1.611                     |
| CHC ⇌ CH+C                                                           | 1.07       | -0.28      | 1.02                   | -0.32                  | 1.04                 | -0.30           | 1.941 (C <sub>1</sub> ); 2.001 (C <sub>1</sub> );<br>1.938 (C <sub>2</sub> ); 1.947 (C <sub>2</sub> ); 2.011 (C <sub>2</sub> ) |                       | 2.080                     |
| CH+C+H ⇌ 2CH                                                         | 0.77       | -0.37      | 0.69                   | -0.28                  | 0.68                 | -0.29           | 1.979                                                                                                                          | 1.670                 | 1.628                     |

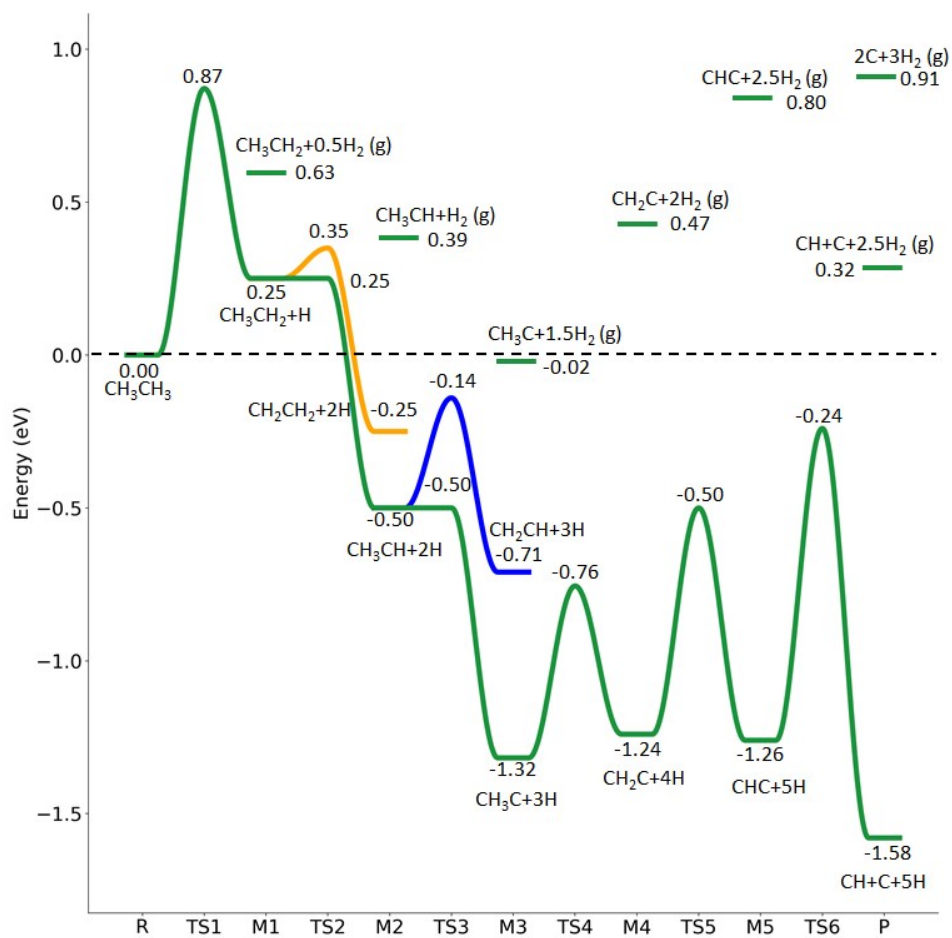

**Figure S3.** Partial potential energy surface of  $\text{CH}_3\text{CH}_3^*$  consecutive dissociation (energy level on the basis of adsorbed  $\text{CH}_3\text{CH}_3^*$ ); the minimum energy path is in green, the path of  $\text{CH}_3\text{CH}_2^* + \text{H}^* \rightarrow \text{CH}_2^*\text{CH}_2^* + 2\text{H}^*$  is in orange, and the path of  $\text{CH}_3\text{CH}^* + 2\text{H}^* \rightarrow \text{CH}_2\text{CH}^* + 3\text{H}^* \rightarrow \text{CH}_2\text{C}^* + 4\text{H}^*$  is in blue; and the energy level of surface carbonaceous species and gaseous  $\text{H}_2$  is also given for comparison.

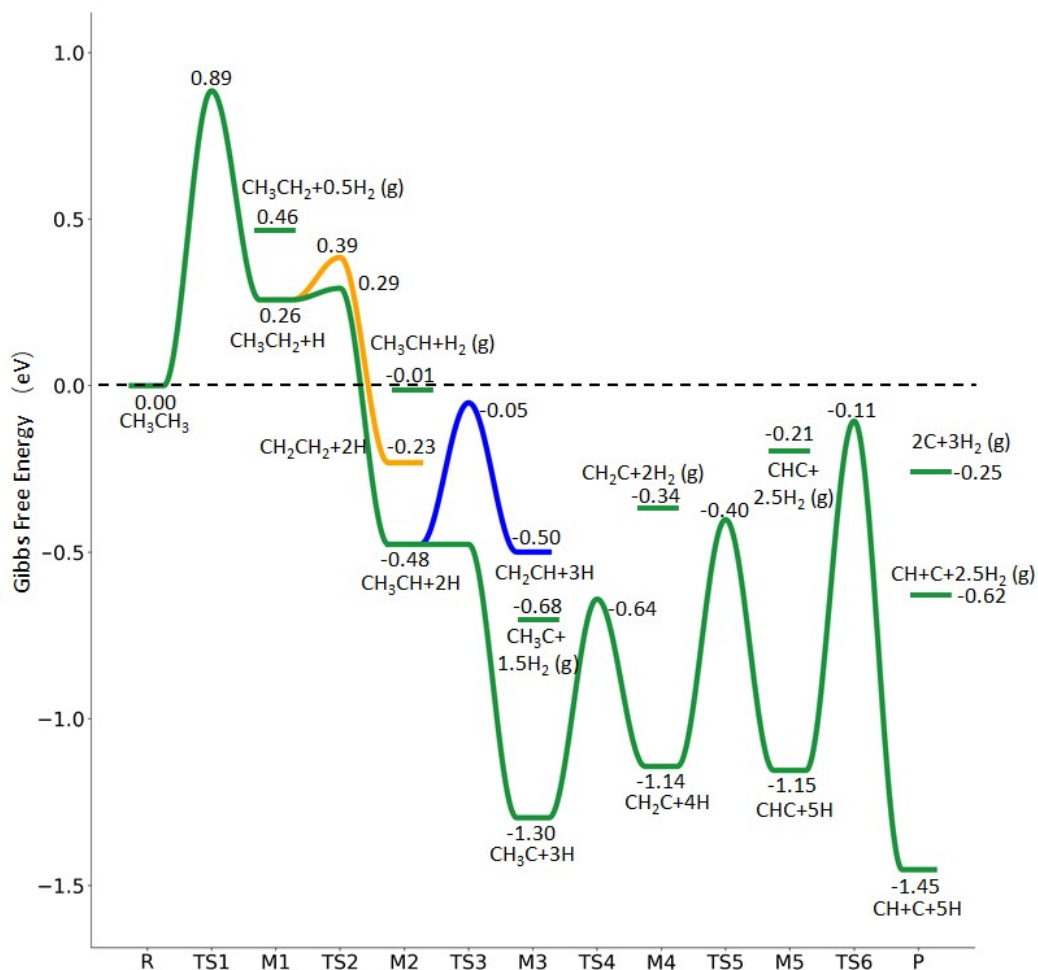

**Figure S4.** Partial Gibbs free energy profiles of  $\text{CH}_3\text{CH}_3^*$  consecutive dissociation at 490 K and 19.7 atm  $\text{H}_2$  (energy level on the basis of adsorbed  $\text{CH}_3\text{CH}_3^*$ ); the minimum energy path is in green, the path of  $\text{CH}_3\text{CH}_2^* + \text{H}^* \rightarrow \text{CH}_2^*\text{CH}_2^* + 2\text{H}^*$  is in orange, and the path of  $\text{CH}_3\text{CH}^* + 2\text{H}^* \rightarrow \text{CH}_2\text{CH}^* + 3\text{H}^* \rightarrow \text{CH}_2\text{C}^* + 4\text{H}^*$  is in blue; and the energy level of surface carbonaceous species and gaseous  $\text{H}_2$  is also given for comparison.

For comparing hcp Ru(0001) and fcc Ru(111) surface, we calculated the dehydrogenation of  $\text{CH}_3\text{CH}_2^*$ . In this part, we used a  $p(4 \times 4)$  hcp Ru(0001) slab to make sure the same coverage with fcc Ru(111) surface. The calculated equilibrium lattice constants for the hcp ruthenium phase are  $a = b = 2.732 \text{ \AA}$ ,  $c = 4.324 \text{ \AA}$ , in agreement with the experiments ( $a = b = 2.751 \text{ \AA}$ ,  $c = 4.282 \text{ \AA}$ ).<sup>2</sup> All calculation methods and accuracy are as the same with fcc Ru(111) surface.

**Table S4.** A comparison of the barrier(eV) and reaction energies(ev) of  $\text{CH}_3\text{CH}_2^*$  dehydrogenation on Ru (111) or Ru (0001) surface, including zero point energy (ZPE) correction.  $d_{\text{Ru-C}}$  and  $d_{\text{Ru-H}}$  respectively for the distance between the top layer Ru atoms and the closet C atom and H atom (the values of  $d_{\text{Ru-C}}$  and  $d_{\text{Ru-H}}$  greater than  $2.5 \text{ \AA}$  are not listed),  $d_{\text{breeking}}$  for the length of the breaking bond in transition states.  $\text{C}_1$  and  $\text{C}_2$  respectively represent for the two C atoms nearest from the surface.

| Reactions                                                                                 | Facets   | $E_a$ | $E_{a(\text{ZPE})}$ | $E_r$ | $E_{r(\text{ZPE})}$ | $d_{\text{Ru-C}} (\text{\AA})$                                                                    | $d_{\text{Ru-H}} (\text{\AA})$ | $d_{\text{breeking}} (\text{\AA})$ |
|-------------------------------------------------------------------------------------------|----------|-------|---------------------|-------|---------------------|---------------------------------------------------------------------------------------------------|--------------------------------|------------------------------------|
| $\text{CH}_3\text{CH}_2 + \text{H} \rightleftharpoons \text{CH}_2\text{CH}_2 + 2\text{H}$ | Ru(0001) | 0.36  | 0.24                | -0.21 | -0.35               | 2.243 ( $\text{C}_1$ ); 2.231 ( $\text{C}_1$ );<br>2.495 ( $\text{C}_2$ ); 2.490 ( $\text{C}_2$ ) | 1.720                          | 1.518                              |
|                                                                                           | Ru(111)  | 0.19  | 0.10                | -0.40 | -0.50               | 2.224 ( $\text{C}_1$ ); 2.227 ( $\text{C}_1$ );<br>2.392 ( $\text{C}_2$ ); 2.391 ( $\text{C}_2$ ) | 1.698                          | 1.529                              |
| $\text{CH}_3\text{CH}_2 + \text{H} \rightleftharpoons \text{CH}_3\text{CH} + 2\text{H}$   | Ru(0001) | 0.36  | 0.23                | -0.20 | -0.35               | 2.161; 2.120; 2.328                                                                               | 1.660                          | 1.618                              |
|                                                                                           | Ru(111)  | 0.09  | 0.00                | -0.63 | -0.75               | 2.137; 2.146; 2.270                                                                               | 1.669                          | 1.516                              |

**Table S5.** ZPE-corrected adsorption energies (eV) of  $\text{CH}_3\text{CH}_2^*$ ,  $\text{CH}_2^*\text{CH}_2^*$ ,  $\text{CH}_3\text{CH}^*$  and  $\text{H}^*$  on  $p(4 \times 4)$  Ru(0001) surface,  $d_{\text{C-C}}$  for the length of the nearest C-C bond from surface,  $d_{\text{Ru-C}}$  and  $d_{\text{Ru-H}}$  respectively for the distance between the top layer Ru atoms and the closet C atom and H atom (the values of  $d_{\text{Ru-C}}$  and  $d_{\text{Ru-H}}$  greater than  $2.5 \text{ \AA}$  are not listed),  $d_{\text{C-H}}$  for the length of the longest C-H bond in adsorbed C atoms, as well as  $f$  for fcc,  $h$  for hcp,  $b$  for bridge and  $t$  for top sites.

|                          | Sit   | $E_{\text{ads}}$ | $d_{\text{C-C}} (\text{\AA})$ | $d_{\text{Ru-C}} (\text{\AA})$                            | $d_{\text{Ru-H}} (\text{\AA})$ | $d_{\text{C-H}} (\text{\AA})$ |
|--------------------------|-------|------------------|-------------------------------|-----------------------------------------------------------|--------------------------------|-------------------------------|
|                          | e     |                  |                               |                                                           |                                |                               |
| $\text{CH}_3\text{CH}_2$ | $h$   | -1.23            | 1.546                         | 2.208; 2.468; 2.486                                       | 2.064; 2.039                   | 1.140; 1.145                  |
| $\text{CH}_2\text{CH}_2$ | $h+t$ | -0.56            | 1.451                         | 2.169 ( $t$ ); 2.248 ( $f$ ); 2.477 ( $f$ ); 2.493( $f$ ) | 2.165; 2.186                   | 1.119                         |
| $\text{CH}_3\text{CH}$   | $h$   | -3.43            | 1.522                         | 2.101; 2.267; 2.100                                       | 1.822                          | 1.206                         |
| H                        | $f$   | -2.78            |                               |                                                           | 1.908; 1.912; 1.930            |                               |

**Table S6.** Zero point energy (ZPE) effect on the energy barriers and reaction energies of elementary reactions of CH<sub>3</sub>CH<sub>3</sub> successive dissociation on the Ru(111) surface except the minimum energy path.  $d_{\text{Ru-C}}$  and  $d_{\text{Ru-H}}$  respectively for the distance between the top layer Ru atoms and the closet C atom and H atom (the values of  $d_{\text{Ru-C}}$  and  $d_{\text{Ru-H}}$  greater than 2.5 Å are not listed),  $d_{\text{breaking}}$  for the length of the breaking bond in transition states. C<sub>1</sub> and C<sub>2</sub> respectively represent for the two C atoms nearest from the surface.

| Reactions                                                          | $E_a$ (eV) | $E_r$ (eV) | $E_a$ (ZPE) (eV) | $E_r$ (ZPE) (eV) | $E_{a(G)}$ (eV) | $\Delta G$ (eV) | $d_{\text{Ru-C}}$ (Å)                                                                                                          | $d_{\text{Ru-H}}$ (Å) | $d_{\text{breaking}}$ (Å) |
|--------------------------------------------------------------------|------------|------------|------------------|------------------|-----------------|-----------------|--------------------------------------------------------------------------------------------------------------------------------|-----------------------|---------------------------|
| CH <sub>2</sub> CH <sub>2</sub> ⇌ CH <sub>2</sub> CH+H             | 0.26       | -0.26      | 0.13             | -0.46            | 0.20            | -0.34           | 2.083; 2.166; 2.264                                                                                                            | 1.680                 | 1.551                     |
| CH <sub>2</sub> CH <sub>2</sub> ⇌ CH <sub>2</sub> +CH <sub>2</sub> | 1.27       | -0.19      | 1.15             | -0.37            | 1.20            | -0.29           | 2.057 (C <sub>1</sub> ); 2.060 (C <sub>2</sub> )                                                                               |                       | 2.018                     |
| CH <sub>2</sub> CH ⇌ CH <sub>2</sub> +CH                           | 0.11       | -0.51      | 0.05             | -0.53            | 0.05            | -0.57           | 2.048; 2.050; 2.103                                                                                                            | 1.682                 | 1.504                     |
| CH <sub>2</sub> CH ⇌ CHCH+H                                        | 0.30       | -0.53      | 0.27             | -0.57            | 0.24            | -0.61           | 2.105; 2.214                                                                                                                   | 1.675                 | 1.520                     |
| CH <sub>2</sub> CH ⇌ CH <sub>2</sub> +CH                           | 0.97       | -0.47      | 0.96             | -0.52            | 0.88            | -0.55           | 1.968 (C <sub>1</sub> ); 2.088 (C <sub>2</sub> )                                                                               |                       | 2.032                     |
| CHCH ⇌ CHC+H                                                       | 0.75       | 0.12       | 0.62             | 0.02             | 0.63            | 0.03            | 1.958; 2.062; 2.064                                                                                                            | 1.698                 | 1.602                     |
| CHCH ⇌ CH+CH                                                       | 0.89       | -0.52      | 0.83             | -0.58            | 0.86            | -0.56           | 1.975 (C <sub>1</sub> ); 2.031 (C <sub>1</sub> );<br>1.978 (C <sub>2</sub> ); 2.030 (C <sub>2</sub> )                          |                       | 1.922                     |
| CC ⇌ C+C                                                           | 1.57       | -0.39      | 1.51             | -0.39            | 1.50            | -0.38           | 1.856 (C <sub>1</sub> ); 1.923 (C <sub>1</sub> );<br>1.898 (C <sub>2</sub> ); 1.917 (C <sub>2</sub> ); 2.165 (C <sub>2</sub> ) |                       | 2.255                     |



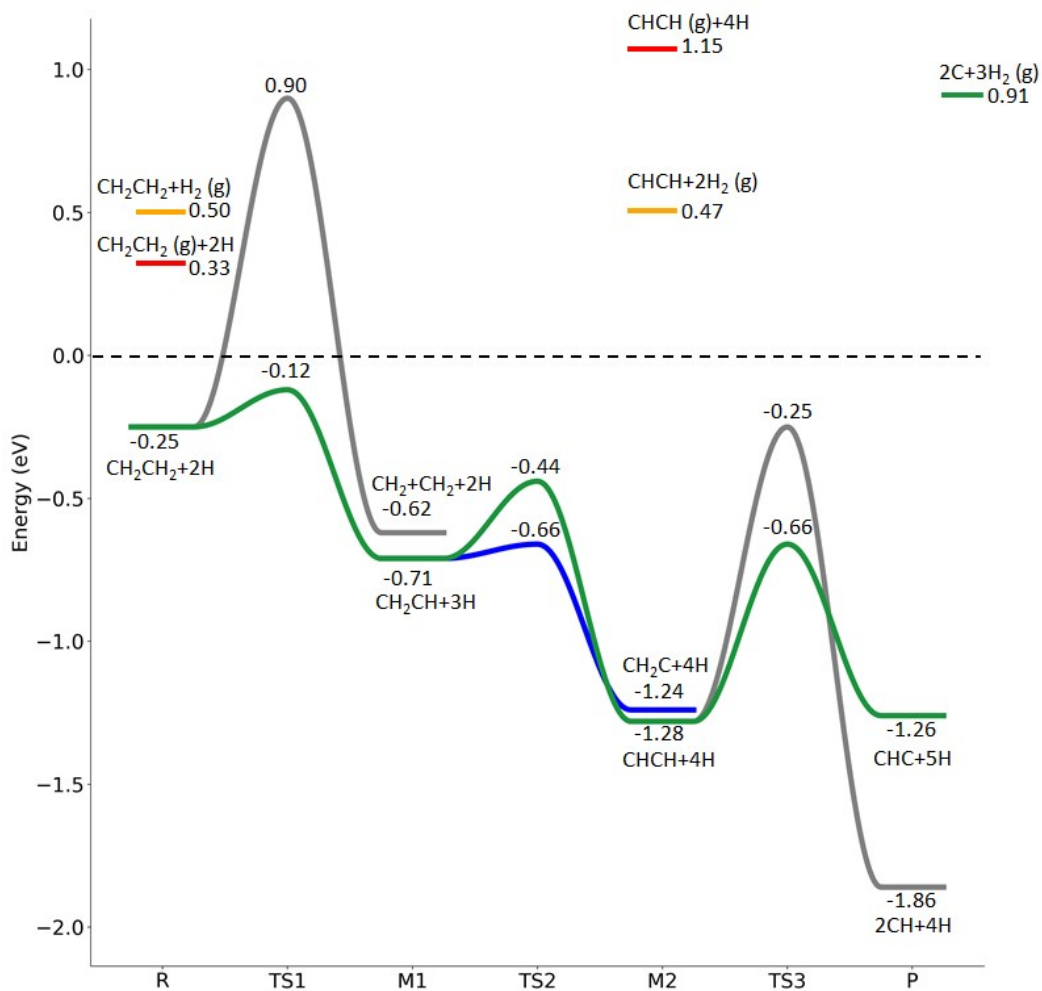

**Figure S5.** Potential energy surface of  $\text{CH}_2^*\text{CH}_2^*$  consecutive dissociation (energy level on the basis of adsorbed  $\text{CH}_3\text{CH}_3^*$ ); combined with Figure S3, a complete potential energy surface of  $\text{CH}_3\text{CH}_3^*$  dissociation is presented; the path of ethene dissociation through ethyne intermediate is in green; the desorption of molecularly adsorbed  $\text{CH}_2^*\text{CH}_2^*$  and  $\text{CH}^*\text{CH}^*$ , surface  $\text{H}^*$  and the break of C-C bond for  $\text{CH}_2^*\text{CH}_2^*+2\text{H}^*$  and  $\text{CH}^*\text{CH}^*+4\text{H}^*$  are given in red, orange, and grey, respectively.

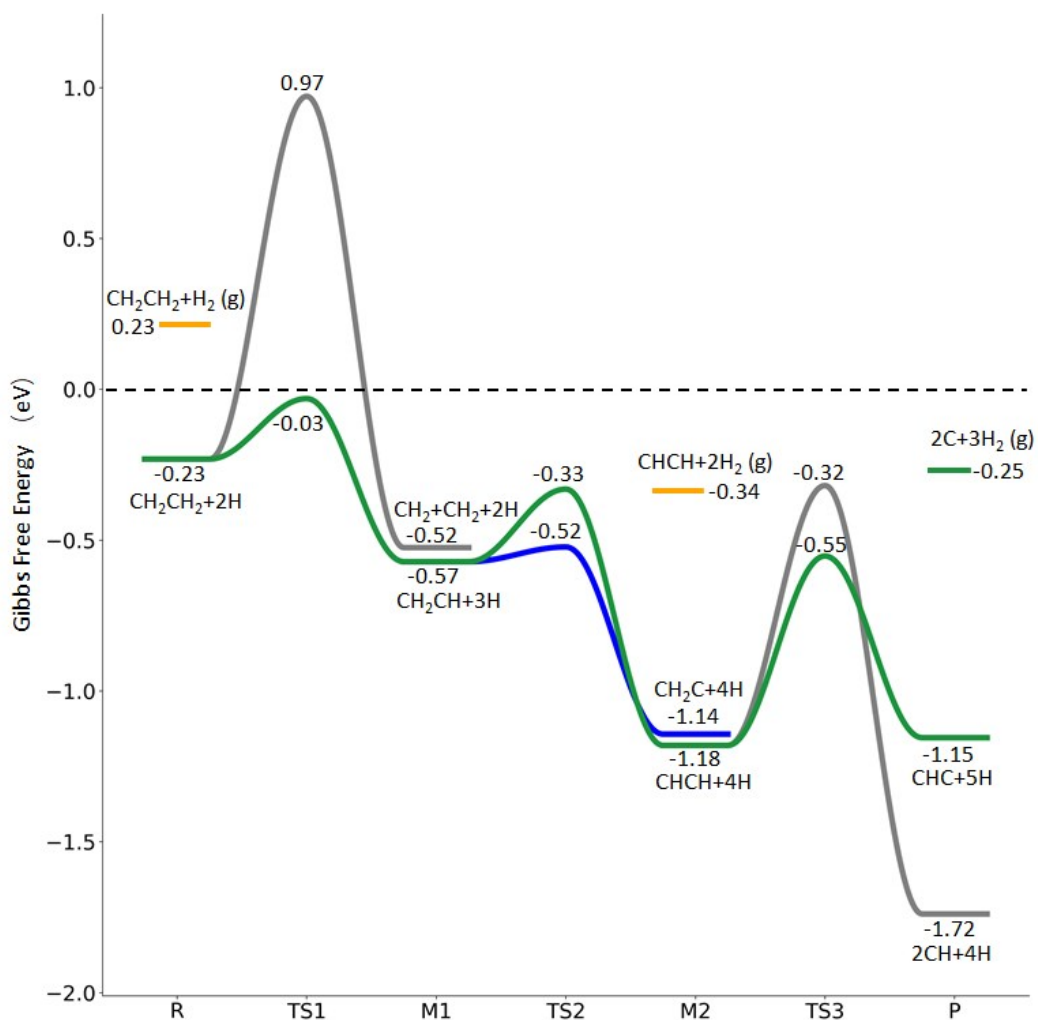

**Figure S6.** Gibbs free energy profiles of CH<sub>2</sub>\*CH<sub>2</sub>\* consecutive dissociation at 490 K and 19.7 atm H<sub>2</sub> (energy level on the basis of adsorbed CH<sub>3</sub>CH<sub>3</sub>\*); combined with Figure S4, a complete potential energy surface of CH<sub>3</sub>CH<sub>3</sub>\* dissociation is presented; the path of ethene dissociation through ethyne intermediate is in green; the desorption of surface H\* and the break of C-C bond for CH<sub>2</sub>\*CH<sub>2</sub>\*+2H\* and CH\*CH\*+4H\* are given in orange, and grey, respectively.

**Table S7.** Zero point energy (ZPE) effect on the energy barriers and reaction energies of elementary reactions of the minimum energy path of CH<sub>3</sub>CH<sub>2</sub>CH<sub>3</sub> successive dissociation on the Ru(111) surface.  $d_{\text{Ru-C}}$  and  $d_{\text{Ru-H}}$  respectively for the distance between the top layer Ru atoms and the closet C atom and H atom (the values of  $d_{\text{Ru-C}}$  and  $d_{\text{Ru-H}}$  greater than 2.5 Å are not listed),  $d_{\text{breaking}}$  for the length of the breaking bond in transition states. C<sub>1</sub> and C<sub>2</sub> respectively represent for the two C atoms nearest from the surface.

| Reactions                                                                                            | $E_a$ (eV) | $E_r$ (eV) | $E_a$ (ZPE) (eV) | $E_r$ (ZPE) (eV) | $E_{a(\text{G})}$ (eV) | $\Delta G$ (eV) | $d_{\text{Ru-C}}$ (Å)                                                                                                             | $d_{\text{Ru-H}}$ (Å) | $d_{\text{breaking}}$ (Å) |
|------------------------------------------------------------------------------------------------------|------------|------------|------------------|------------------|------------------------|-----------------|-----------------------------------------------------------------------------------------------------------------------------------|-----------------------|---------------------------|
| CH <sub>3</sub> CH <sub>2</sub> CH <sub>3</sub> ⇌ CH <sub>3</sub> CH <sub>2</sub> CH <sub>2</sub> +H | 1.11       | 0.45       | 0.93             | 0.25             | 0.79                   | 0.15            | 2.323                                                                                                                             | 1.684                 | 1.642                     |
| CH <sub>3</sub> CH <sub>2</sub> CH <sub>3</sub> ⇌ CH <sub>3</sub> CHCH <sub>3</sub> +H               | 1.07       | 0.61       | 0.89             | 0.47             | 0.76                   | 0.40            | 2.356                                                                                                                             | 1.664                 | 1.672                     |
| CH <sub>3</sub> CH <sub>2</sub> CH <sub>3</sub> ⇌ CH <sub>3</sub> CH <sub>2</sub> +CH <sub>3</sub>   | 2.88       | 0.81       | 2.67             | 0.56             | 2.53                   | 0.39            | 2.174 (C <sub>1</sub> ); 2.261 (C <sub>2</sub> )                                                                                  |                       | 1.947                     |
| CH <sub>3</sub> CH <sub>2</sub> CH <sub>2</sub> ⇌ CH <sub>3</sub> CH <sub>2</sub> CH+H               | 0.28       | -0.54      | 0.13             | -0.70            | 0.15                   | -0.65           | 2.118; 2.156; 2.271                                                                                                               | 1.671                 | 1.568                     |
| CH <sub>3</sub> CH <sub>2</sub> CH <sub>2</sub> ⇌ CH <sub>2</sub> CHCH <sub>2</sub> +H               | 0.25       | -0.39      | 0.13             | -0.51            | 0.16                   | -0.53           | 2.202; 2.269                                                                                                                      | 1.701                 | 1.522                     |
| CH <sub>3</sub> CH <sub>2</sub> CH <sub>2</sub> ⇌ CH <sub>3</sub> CH <sub>2</sub> +CH <sub>2</sub>   | 0.95       | 0.04       | 0.85             | -0.14            | 0.83                   | -0.19           | 2.070 (C <sub>1</sub> ); 2.383 (C <sub>2</sub> )                                                                                  |                       | 2.046                     |
| CH <sub>3</sub> CH <sub>2</sub> CH ⇌ CH <sub>3</sub> CH <sub>2</sub> C+H                             | 0.02       | -0.79      | -0.01            | -0.83            | -0.11                  | -0.89           | 2.083; 2.093; 2.130                                                                                                               | 1.673                 | 1.406                     |
| CH <sub>3</sub> CH <sub>2</sub> CH ⇌ CH <sub>2</sub> CHCH+H                                          | 0.47       | -0.10      | 0.34             | -0.22            | 0.28                   | -0.26           | 2.308                                                                                                                             | 1.683                 | 1.590                     |
| CH <sub>3</sub> CH <sub>2</sub> CH ⇌ CH <sub>3</sub> CH <sub>2</sub> +CH                             | 0.96       | -0.06      | 0.93             | -0.13            | 0.86                   | -0.18           | 2.043 (C <sub>1</sub> ); 2.388 (C <sub>2</sub> )                                                                                  |                       | 1.987                     |
| CH <sub>3</sub> CH <sub>2</sub> C ⇌ CH <sub>3</sub> CHC+H                                            | 0.66       | 0.11       | 0.51             | -0.04            | 0.55                   | -0.01           | 2.354                                                                                                                             | 1.680                 | 1.686                     |
| CH <sub>3</sub> CH <sub>2</sub> C ⇌ CH <sub>3</sub> CH <sub>2</sub> +C                               | 1.71       | 0.99       | 1.61             | 0.87             | 1.71                   | 0.88            | 1.936 (C <sub>1</sub> ); 2.374 (C <sub>2</sub> )                                                                                  |                       | 2.147                     |
| CH <sub>3</sub> CHC ⇌ CH <sub>3</sub> CC+H                                                           | 0.89       | 0.05       | 0.89             | -0.09            | 0.78                   | -0.09           | 2.250; 2.278                                                                                                                      | 1.737                 | 1.483                     |
| CH <sub>3</sub> CHC ⇌ CH <sub>3</sub> CH+C                                                           | 1.79       | 0.43       | 1.70             | 0.32             | 1.78                   | 0.33            | 1.987 (C <sub>1</sub> ); 2.042 (C <sub>2</sub> )                                                                                  |                       | 2.304                     |
| CH <sub>3</sub> CC ⇌ CH <sub>3</sub> C+C                                                             | 1.04       | -0.31      | 0.99             | -0.34            | 0.99                   | -0.33           | 1.955 (C <sub>1</sub> ); 2.040 (C <sub>1</sub> );<br>1.946 (C <sub>2</sub> ); 1.950 (C <sub>2</sub> );<br>1.998 (C <sub>2</sub> ) |                       | 2.059                     |
| CH <sub>3</sub> CC ⇌ CH <sub>3</sub> +CC                                                             | 2.00       | 1.28       | 1.96             | 1.20             | 2.08                   | 1.27            | 1.955 (C <sub>1</sub> ); 2.094 (C <sub>1</sub> );<br>2.139 (C <sub>1</sub> ); 2.358 (C <sub>2</sub> )                             |                       | 2.153                     |
| CH <sub>3</sub> C+C+H ⇌ CH <sub>3</sub> C+CH                                                         | 0.77       | -0.35      | 0.68             | -0.29            | 0.64                   | 0.41            | 1.974                                                                                                                             | 1.671                 | 1.630                     |

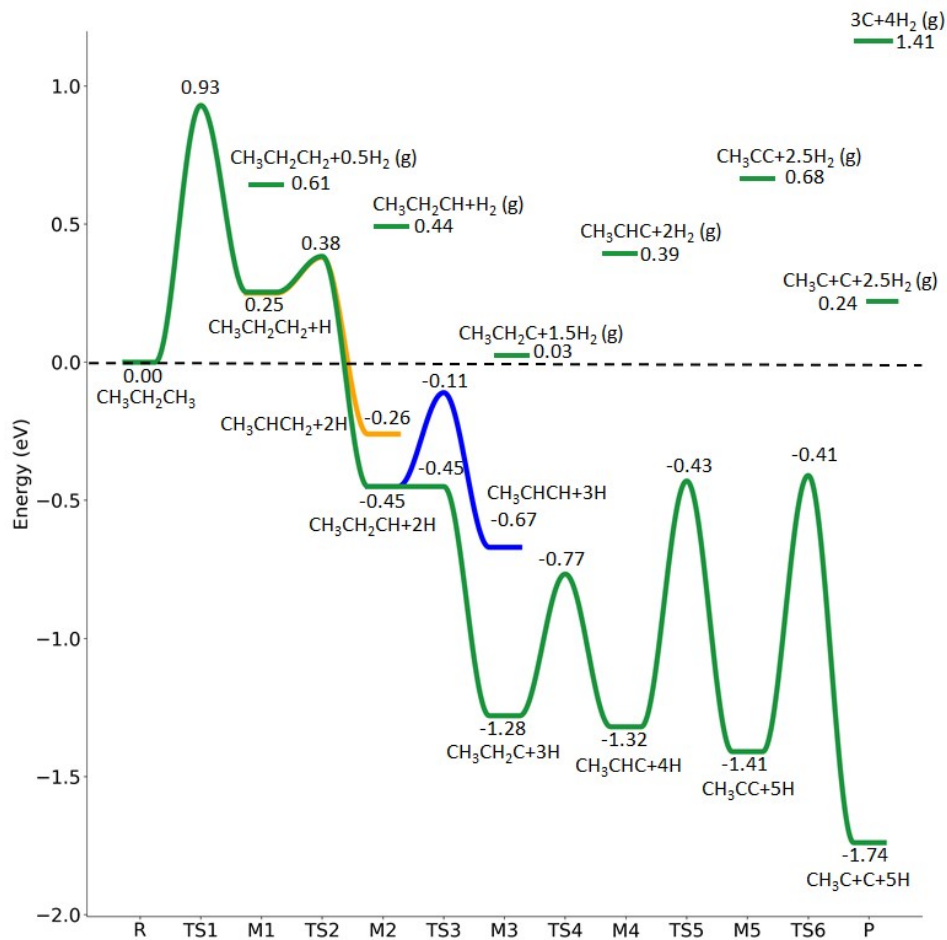

**Figure S7.** Partial potential energy surface of  $\text{CH}_3\text{CH}_2\text{CH}_3^*$  consecutive dissociation (energy level on the basis of adsorbed  $\text{CH}_3\text{CH}_2\text{CH}_3^*$ ); the minimum energy path is in green, the path of  $\text{CH}_3\text{CH}_2\text{CH}_2^* + \text{H}^* \rightarrow \text{CH}_3\text{CH}^*\text{CH}_2^* + 2\text{H}^*$  is in orange, and the path of  $\text{CH}_3\text{CH}_2\text{CH}^* + 2\text{H}^* \rightarrow \text{CH}_3\text{CH}^*\text{CH}^* + 3\text{H}^* \rightarrow \text{CH}_3\text{CH}^*\text{C}^* + 4\text{H}^*$  is in blue; and the energy level of surface carbonaceous species and gaseous  $\text{H}_2$  is also given for comparison.

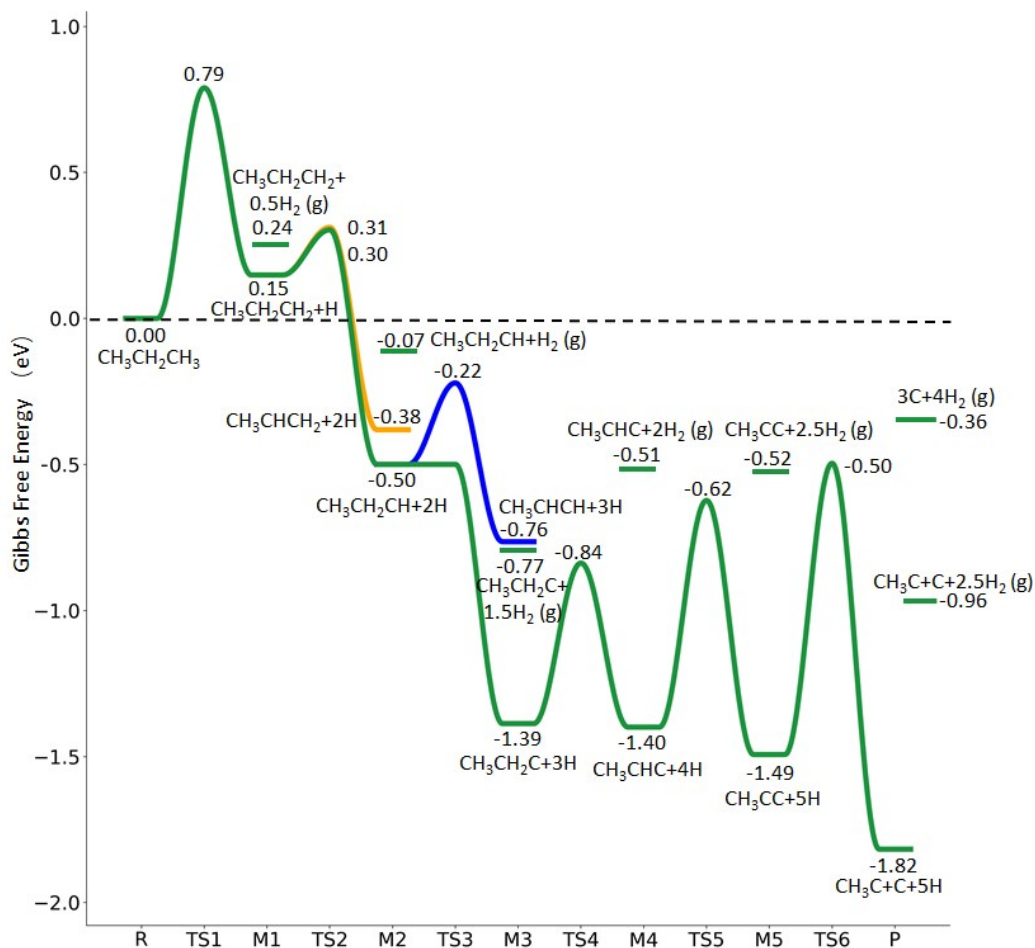

**Figure S8.** Gibbs free energy profiles of  $\text{CH}_3\text{CH}_2\text{CH}_3^*$  consecutive dissociation at 490 K and 19.7 atm  $\text{H}_2$  (energy level on the basis of adsorbed  $\text{CH}_3\text{CH}_2\text{CH}_3^*$ ); the minimum energy path is in green, the path of  $\text{CH}_3\text{CH}_2\text{CH}_2^* + \text{H}^* \rightarrow \text{CH}_3\text{CH}^*\text{CH}_2^* + 2\text{H}^*$  is in orange, and the path of  $\text{CH}_3\text{CH}_2\text{CH}^* + 2\text{H}^* \rightarrow \text{CH}_3\text{CH}^*\text{CH}^* + 3\text{H}^* \rightarrow \text{CH}_3\text{CH}^*\text{C}^* + 4\text{H}^*$  is in blue; and the energy level of surface carbonaceous species and gaseous  $\text{H}_2$  is also given for comparison.

**Table S8.** Zero point energy (ZPE) effect on the energy barriers and reaction energies of elementary reactions of CH<sub>3</sub>CH<sub>2</sub>CH<sub>3</sub> successive dissociation on the Ru(111) surface except the minimum energy path.  $d_{\text{Ru-C}}$  and  $d_{\text{Ru-H}}$  respectively for the distance between the top layer Ru atoms and the closet C atom and H atom (the values of  $d_{\text{Ru-C}}$  and  $d_{\text{Ru-H}}$  greater than 2.5 Å are not listed),  $d_{\text{breaking}}$  for the length of the breaking bond in transition states. C<sub>1</sub> and C<sub>2</sub> respectively represent for the two C atoms nearest from the surface.

| Reactions                                                                | $E_a$ (eV) | $E_r$ (eV) | $E_{a(\text{ZPE})}$ (eV) | $E_{r(\text{ZPE})}$ (eV) | $E_{a(\text{G})}$ (eV) | $\Delta G$ (eV) | $d_{\text{Ru-C}}$ (Å)                                                                                                             | $d_{\text{Ru-H}}$ (Å) | $d_{\text{breaking}}$ (Å) |
|--------------------------------------------------------------------------|------------|------------|--------------------------|--------------------------|------------------------|-----------------|-----------------------------------------------------------------------------------------------------------------------------------|-----------------------|---------------------------|
| CH <sub>3</sub> CHCH <sub>3</sub> ⇌ CH <sub>3</sub> CHCH <sub>2</sub> +H | 0.93       | -0.10      | 0.73                     | -0.73                    | 0.71                   | 0.78            |                                                                                                                                   | 1.716                 | 1.581                     |
| CH <sub>3</sub> CHCH <sub>3</sub> ⇌ CH <sub>3</sub> CCH <sub>3</sub> +H  | 0.57       | -0.28      | 0.37                     | -0.46                    | 0.33                   | -0.55           | 1.999                                                                                                                             | 1.680                 | 1.660                     |
| CH <sub>3</sub> CHCH <sub>3</sub> ⇌ CH <sub>3</sub> CH+CH <sub>3</sub>   | 1.27       | -0.46      | 1.16                     | -0.69                    | 1.05                   | -0.80           | 2.082 (C <sub>1</sub> ); 2.333 (C <sub>1</sub> );<br>2.310 (C <sub>2</sub> )                                                      |                       | 2.013                     |
| CH <sub>3</sub> CHCH <sub>2</sub> ⇌ CH <sub>3</sub> CHCH+H               | 0.41       | -0.25      | 0.24                     | -0.41                    | 0.28                   | -0.38           | 2.101; 2.128; 2.244                                                                                                               | 1.688                 | 1.579                     |
| CH <sub>3</sub> CHCH <sub>2</sub> ⇌ CH <sub>3</sub> CCH <sub>2</sub> +H  | 0.33       | -0.12      | 0.18                     | -0.32                    | 0.23                   | -0.26           | 2.090; 2.281                                                                                                                      | 1.672                 | 1.548                     |
| CH <sub>3</sub> CHCH <sub>2</sub> ⇌ CH <sub>3</sub> CH+CH <sub>2</sub>   | 1.17       | -0.11      | 1.04                     | -0.30                    | 0.90                   | -0.24           | 2.003 (C <sub>1</sub> ); 2.120 (C <sub>2</sub> )                                                                                  |                       | 2.100                     |
| CH <sub>3</sub> CCH <sub>3</sub> ⇌ CH <sub>3</sub> CCH <sub>2</sub> +H   | 0.50       | -0.38      | 0.34                     | -0.57                    | 0.36                   | -0.49           | 2.273                                                                                                                             | 1.646                 | 1.560                     |
| CH <sub>3</sub> CCH <sub>3</sub> ⇌ CH <sub>3</sub> C+CH <sub>3</sub>     | 0.81       | -0.96      | 0.76                     | -1.06                    | 0.85                   | -1.06           | 2.179 (C <sub>1</sub> ); 2.306 (C <sub>2</sub> )                                                                                  |                       | 1.985                     |
| CH <sub>3</sub> CHCH ⇌ CH <sub>3</sub> CHC+H                             | 0.10       | -0.59      | 0.03                     | -0.65                    | 0.03                   | -0.64           | 2.051; 2.069; 2.099                                                                                                               | 1.673                 | 1.524                     |
| CH <sub>3</sub> CHCH ⇌ CH <sub>3</sub> CCH+H                             | 0.24       | -0.56      | 0.15                     | -0.66                    | 0.17                   | -0.64           | 2.134; 2.270                                                                                                                      | 1.676                 | 1.481                     |
| CH <sub>3</sub> CHCH ⇌ CH <sub>3</sub> CH+CH                             | 0.88       | -0.46      | 0.84                     | -0.54                    | 0.95                   | -0.51           | 1.973 (C <sub>1</sub> ); 2.108 (C <sub>2</sub> )                                                                                  |                       | 2.055                     |
| CH <sub>3</sub> CCH <sub>2</sub> ⇌ CH <sub>3</sub> CCH+H                 | 0.18       | -0.69      | 0.09                     | -0.75                    | 0.08                   | -0.76           | 2.109; 2.207                                                                                                                      | 1.672                 | 1.528                     |
| CH <sub>3</sub> CCH <sub>2</sub> ⇌ CH <sub>3</sub> C+CH <sub>2</sub>     | 1.08       | -0.75      | 1.04                     | -0.79                    | 0.99                   | -0.81           | 1.951 (C <sub>1</sub> ); 2.189 (C <sub>2</sub> )                                                                                  |                       | 2.016                     |
| CH <sub>3</sub> CCH ⇌ CH <sub>3</sub> CC+H                               | 0.72       | 0.03       | 0.58                     | -0.10                    | 0.54                   | -0.09           | 1.966; 2.061; 2.073                                                                                                               | 1.699                 | 1.601                     |
| CH <sub>3</sub> CCH ⇌ CH <sub>3</sub> C+CH                               | 1.04       | -0.63      | 0.85                     | -0.71                    | 0.80                   | -0.68           | 1.991 (C <sub>1</sub> ); 2.051 (C <sub>1</sub> );<br>2.313 (C <sub>1</sub> ); 1.986 (C <sub>2</sub> );<br>2.035 (C <sub>2</sub> ) |                       | 1.922                     |

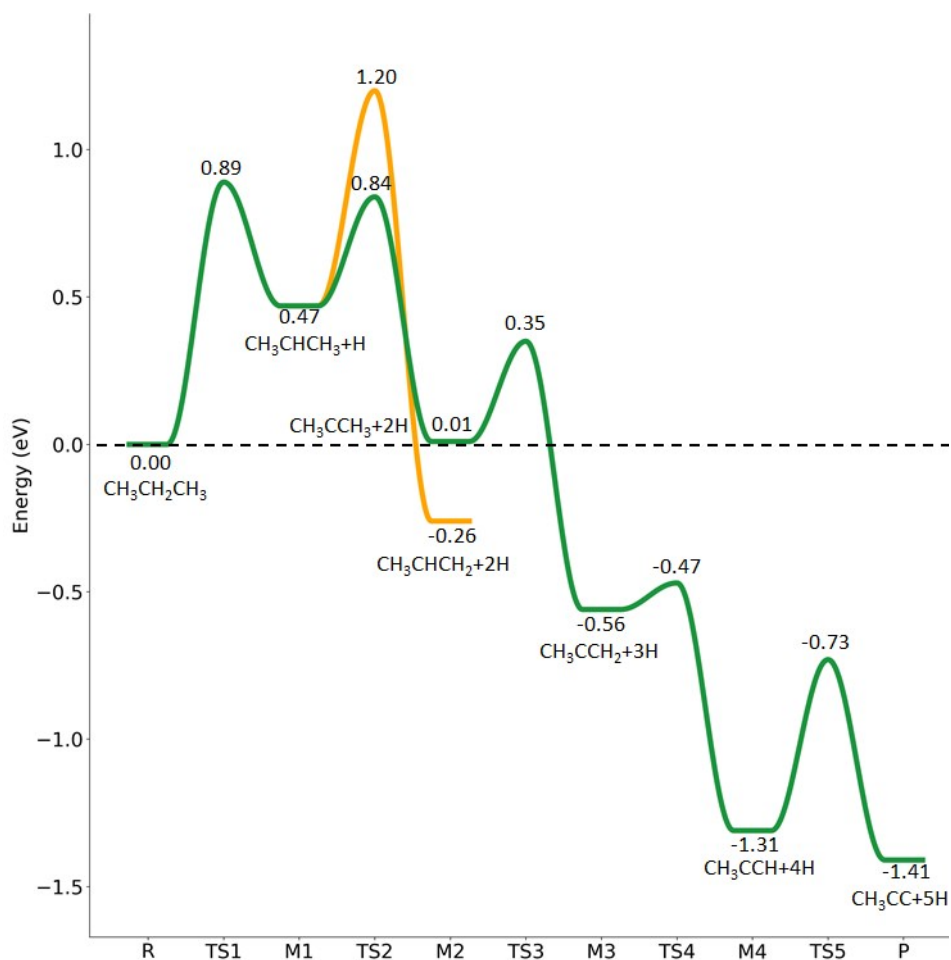

**Figure S9.** Partial supplement to potential energy surface of  $\text{CH}_3\text{CH}_2\text{CH}_3^*$  consecutive dissociation adsorption (energy level on the basis of adsorbed  $\text{CH}_3\text{CH}_2\text{CH}_3^*$ ); the path of  $\text{CH}_3\text{CH}^*\text{CH}_3+\text{H}^* \rightarrow \text{CH}_3\text{CCH}_3^*+2\text{H}^* \rightarrow \text{CH}_3\text{C}^*\text{CH}_2^*+3\text{H}^* \rightarrow \text{CH}_3\text{C}^*\text{CH}^*+4\text{H}^* \rightarrow \text{CH}_3\text{C}^*\text{C}^*+5\text{H}^*$  is in green, the path of  $\text{CH}_3\text{CH}^*\text{CH}_3+\text{H}^* \rightarrow \text{CH}_3\text{CH}^*\text{CH}_2^*+2\text{H}^*$  is in orange.

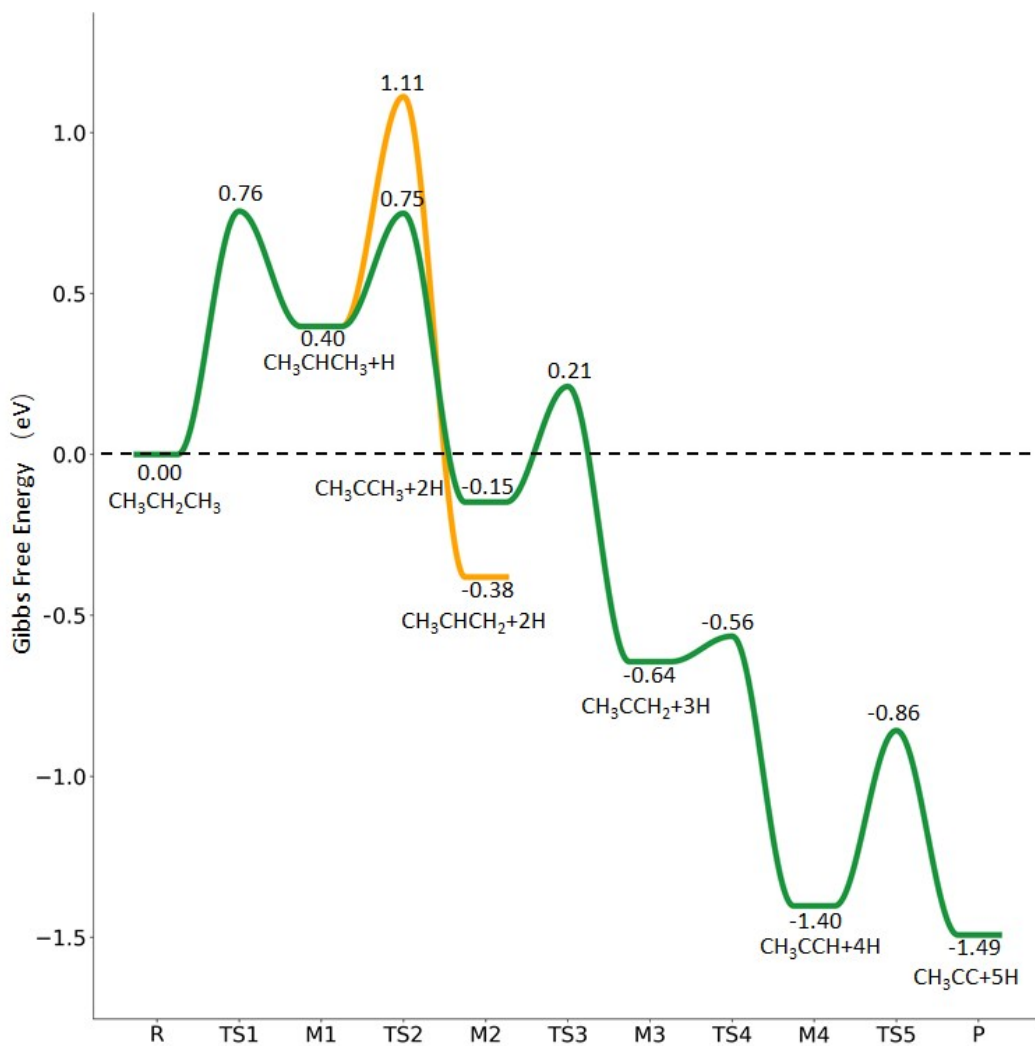

**Figure S10.** Partial supplement to Gibbs free energy profiles of CH<sub>3</sub>CH<sub>2</sub>CH<sub>3</sub>\* consecutive dissociation adsorption at 490 K and 19.7 atm H<sub>2</sub> (energy level on the basis of adsorbed CH<sub>3</sub>CH<sub>2</sub>CH<sub>3</sub>\*); the path of CH<sub>3</sub>CH\*CH<sub>3</sub>+H\* → CH<sub>3</sub>CCH<sub>3</sub>\*+2H\* → CH<sub>3</sub>C\*CH<sub>2</sub>\*+3H\* → CH<sub>3</sub>C\*CH\*+4H\* → CH<sub>3</sub>C\*C\*+5H\* is in green, the path of CH<sub>3</sub>CH\*CH<sub>3</sub>+H\* → CH<sub>3</sub>CH\*CH<sub>2</sub>\*+2H\* is in orange.



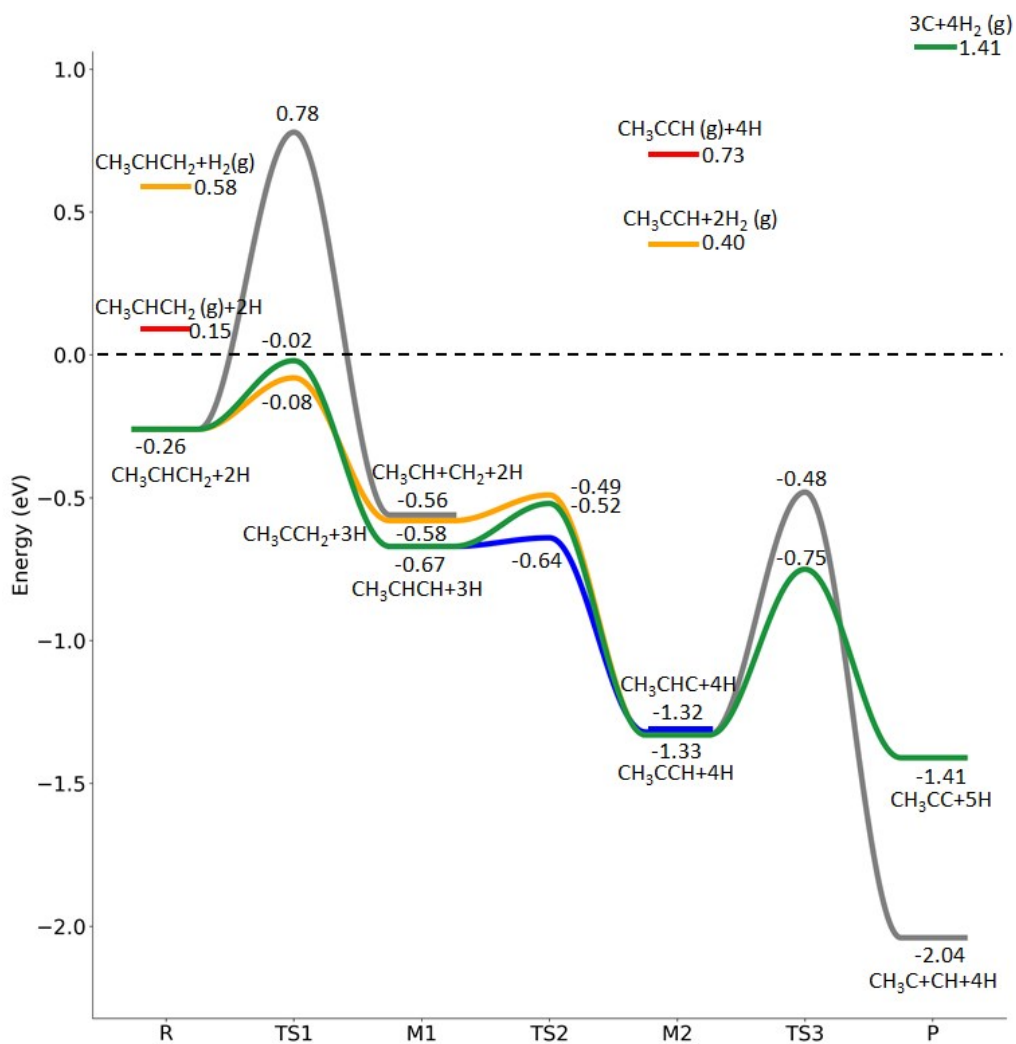

**Figure S11.** Potential energy surface of  $\text{CH}_3\text{CH}^*\text{CH}_2^*$  consecutive dissociation (energy level on the basis of adsorbed  $\text{CH}_3\text{CH}_2\text{CH}_3^*$ ); combined with Figures S7 and S9, a complete potential energy surface of  $\text{CH}_3\text{CH}_2\text{CH}_3^*$  dissociation is presented; the path of propene dissociation through propyne intermediate is in green; the path of  $\text{CH}_3\text{CH}^*\text{CH}_2^* + 2\text{H}^* \rightarrow \text{CH}_3\text{C}^*\text{CH}_2^* + 3\text{H}^* \rightarrow \text{CH}_3\text{C}^*\text{CH}^* + 4\text{H}^*$  is in orange; the path of  $\text{CH}_3\text{CH}^*\text{CH}^* + 3\text{H}^* \rightarrow \text{CH}_3\text{CH}^*\text{C}^* + 4\text{H}^*$  is in blue; the desorption of molecularly adsorbed  $\text{CH}_3\text{CH}^*\text{CH}_2^*$  and  $\text{CH}_3\text{C}^*\text{CH}^*$ , surface  $\text{H}^*$  and the break of C-C bond for  $\text{CH}_3\text{CH}^*\text{CH}_2^* + 2\text{H}^*$  and  $\text{CH}_3\text{C}^*\text{CH}^* + 4\text{H}^*$  are respectively in red, orange, and grey.

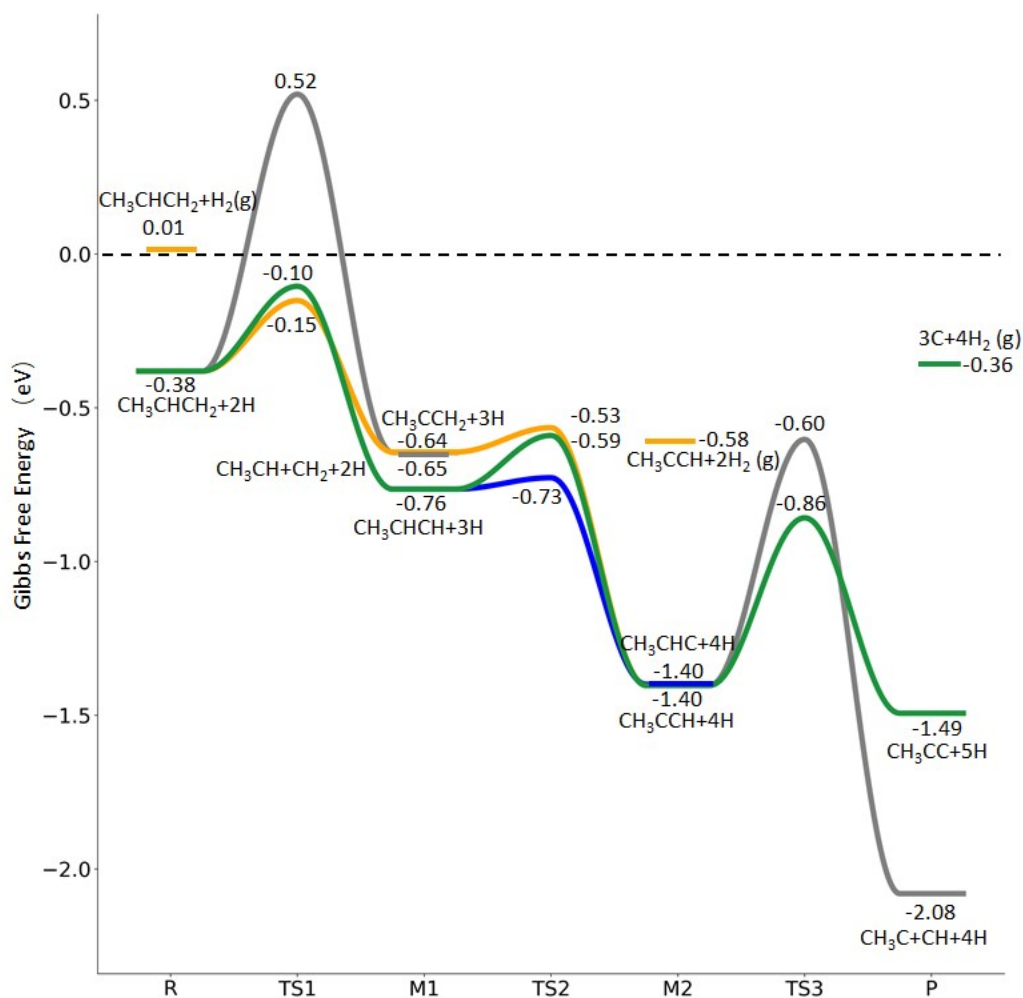

**Figure S12.** Gibbs free energy profiles of  $\text{CH}_3\text{CH}^*\text{CH}_2^*$  consecutive dissociation at 490 K and 19.7 atm  $\text{H}_2$  (energy level on the basis of adsorbed  $\text{CH}_3\text{CH}_2\text{CH}_3^*$ ); combined with Figures S8 and S10, a complete potential energy surface of  $\text{CH}_3\text{CH}_2\text{CH}_3^*$  dissociation is presented; the path of propene dissociation through propyne intermediate is in green; the path of  $\text{CH}_3\text{CH}^*\text{CH}_2^* + 2\text{H}^* \rightarrow \text{CH}_3\text{C}^*\text{CH}_2^* + 3\text{H}^* \rightarrow \text{CH}_3\text{C}^*\text{CH}^* + 4\text{H}^*$  is in orange; the path of  $\text{CH}_3\text{CH}^*\text{CH}^* + 3\text{H}^* \rightarrow \text{CH}_3\text{CH}^*\text{C}^* + 4\text{H}^*$  is in blue; the desorption of surface  $\text{H}^*$  and the break of C-C bond for  $\text{CH}_3\text{CH}^*\text{CH}_2^* + 2\text{H}^*$  and  $\text{CH}_3\text{C}^*\text{CH}^* + 4\text{H}^*$  are respectively in orange and grey

**Table S9.** Computed vibrational frequencies of CH<sub>3</sub>\*, CH<sub>3</sub>CH<sub>2</sub>\*, and CH<sub>3</sub>CH<sub>2</sub>CH<sub>2</sub>\* adsorbed on the Ru(111) surface. ( $\nu$ ,  $\delta$ ,  $\rho$ , and  $\tau$  represent the mode of stretching, scissoring, rocking, wagging and twisting, respectively, the subscript of a and s represent the asymmetric and symmetric modes, respectively.)

| CH <sub>3</sub> * | Mode                    | CH <sub>3</sub> CH <sub>2</sub> * | Mode                    | CH <sub>3</sub> CH <sub>2</sub> CH <sub>2</sub> * | Mode                                                |
|-------------------|-------------------------|-----------------------------------|-------------------------|---------------------------------------------------|-----------------------------------------------------|
| 2862              | $\nu_s(\text{CH}_3)$    | 3074                              | $\nu_a(\text{CH}_3)$    | 3073                                              | $\nu_s(\text{CH}_3)$<br>$\nu_s(\text{centre CH}_2)$ |
| 2824              | $\nu(\text{CH}_3)$      | 3062                              | $\nu_s(\text{CH}_3)$    | 3055                                              | $\nu_a(\text{CH}_3)$<br>$\nu(\text{centre CH}_2)$   |
| 2811              | $\nu(\text{CH}_3)$      | 2977                              | $\nu(\text{CH}_3)$      | 3047                                              | $\nu(\text{CH}_3)$                                  |
| 1309              | $\delta_a(\text{CH}_3)$ | 2465                              | $\nu(\text{CH}_3)$      | 3033                                              | $\nu(\text{CH}_3)$<br>$\nu(\text{centre CH}_2)$     |
| 1303              | $\delta_a(\text{CH}_3)$ | 2422                              | $\nu(\text{CH}_3)$      | 2978                                              | $\nu(\text{centre CH}_2)$                           |
| 1178              | $\delta_s(\text{CH}_3)$ | 1457                              | $\delta_a(\text{CH}_3)$ | 2375                                              | $\nu_s(\text{end CH}_2)$                            |
|                   |                         | 1454                              | $\delta_a(\text{CH}_3)$ | 2350                                              | $\nu_a(\text{centre CH}_2)$                         |
|                   |                         | 1369                              | $\delta_s(\text{CH}_3)$ | 1468                                              | $\delta_a(\text{CH}_3)$                             |
|                   |                         | 1356                              | $\omega(\text{CH}_2)$   | 1455                                              | $\delta_a(\text{CH}_3)$                             |
|                   |                         | 1319                              |                         | 1446                                              | $\delta(\text{centre CH}_2)$                        |
|                   |                         | 1197                              | $\delta(\text{CH}_2)$   | 1388                                              |                                                     |
|                   |                         | 993                               |                         | 1378                                              |                                                     |
|                   |                         | 983                               |                         | 1371                                              | $\delta_s(\text{CH}_3)$                             |
|                   |                         | 943                               | $\nu(\text{CC})$        | 1290                                              | $\omega(\text{centre CH}_2)$                        |
|                   |                         | 632                               | $\rho(\text{CH}_2)$     | 1244                                              |                                                     |
|                   |                         |                                   |                         | 1160                                              | $\delta(\text{end CH}_2)$                           |
|                   |                         |                                   |                         | 1048                                              |                                                     |
|                   |                         |                                   |                         | 1043                                              | $\nu(\text{far CC})$                                |
|                   |                         |                                   |                         | 1029                                              | $\nu_a(\text{both CC})$                             |
|                   |                         |                                   |                         | 853                                               | $\nu_s(\text{both CC})$                             |
|                   |                         |                                   |                         | 780                                               |                                                     |

**Table S10.** Computed vibrational frequencies of CH<sub>2</sub>\*, CH<sub>3</sub>CH\* and CH<sub>3</sub>CH<sub>2</sub>CH\* adsorbed on the Ru(111) surface. ( $\nu$ ,  $\delta$ ,  $\rho$ ,  $\omega$ , and  $\tau$  represent the mode of stretching, scissoring, rocking, wagging and twisting, respectively, the subscript of a and s represent the asymmetric and symmetric modes, respectively.)

| CH <sub>2</sub> * | Mode                  | CH <sub>3</sub> CH* | Mode                    | CH <sub>3</sub> CH <sub>2</sub> CH* | Mode                    |
|-------------------|-----------------------|---------------------|-------------------------|-------------------------------------|-------------------------|
| 2982              | $\nu(\text{CH}_2)$    | 3062                | $\nu(\text{CH}_3)$      | 3075                                | $\nu_s(\text{CH}_3)$    |
|                   |                       |                     |                         |                                     | $\nu_s(\text{CH}_2)$    |
| 1938              | $\nu(\text{CH}_2)$    | 3016                | $\nu(\text{CH}_3)$      | 3051                                | $\nu_a(\text{CH}_3)$    |
|                   | $\nu(\text{Metal-H})$ |                     |                         |                                     |                         |
| 1535              | $\delta(\text{CH}_2)$ | 2996                | $\nu(\text{CH}_3)$      | 3037                                | $\nu(\text{CH}_3)$      |
| 696               | $\omega(\text{CH}_2)$ | 1808                | $\nu(\text{CH})$        | 3017                                | $\nu_s(\text{CH}_2)$    |
|                   |                       |                     | $\nu(\text{Metal-H})$   |                                     |                         |
| 678               | $\rho(\text{CH}_2)$   | 1490                | $\nu(\text{CH})$        | 2980                                | $\nu_a(\text{CH}_2)$    |
|                   |                       | 1430                | $\delta_a(\text{CH}_3)$ | 1880                                | $\nu(\text{CH})$        |
|                   |                       |                     |                         |                                     | $\nu(\text{Metal-H})$   |
|                   |                       | 1427                | $\delta_a(\text{CH}_3)$ | 1458                                | $\delta_a(\text{CH}_3)$ |
|                   |                       | 1340                | $\delta_s(\text{CH}_3)$ | 1451                                | $\delta_a(\text{CH}_3)$ |
|                   |                       | 980                 |                         | 1425                                | $\delta(\text{CH}_2)$   |
|                   |                       | 961                 |                         | 1371                                | $\delta_s(\text{CH}_3)$ |
|                   |                       | 948                 | $\nu(\text{CC})$        | 1303                                |                         |
|                   |                       |                     |                         | 1269                                |                         |
|                   |                       |                     |                         | 1237                                |                         |
|                   |                       |                     |                         | 1057                                | $\nu_s(\text{both CC})$ |
|                   |                       |                     |                         | 1048                                |                         |
|                   |                       |                     |                         | 1040                                |                         |
|                   |                       |                     |                         | 878                                 | $\nu_s(\text{both CC})$ |
|                   |                       |                     |                         | 771                                 |                         |

**Table S11.** Computed vibrational frequencies of CH<sub>3</sub>CH\*CH<sub>3</sub> and CH<sub>3</sub>C\*CH<sub>3</sub> adsorbed on the Ru(111) surface. ( $\nu$ ,  $\delta$ ,  $\rho$ ,  $\omega$ , and  $\tau$  represent the mode of stretching, scissoring, rocking, wagging and twisting, respectively, the subscript of a and s represent the asymmetric and symmetric modes, respectively.)

| CH <sub>3</sub> CH*CH <sub>3</sub> | Mode                               | CH <sub>3</sub> C*CH <sub>3</sub> | Mode                                  |
|------------------------------------|------------------------------------|-----------------------------------|---------------------------------------|
| 3049                               | $\nu(1^{\text{st}} \text{CH}_3)$   | 3010                              | $\nu(1^{\text{st}} \text{CH}_3)$      |
| 3007                               | $\nu(2^{\text{nd}} \text{CH}_3)$   | 3007                              | $\nu_s(2^{\text{nd}} \text{CH}_3)$    |
| 2990                               | $\nu(1^{\text{st}} \text{CH}_3)$   | 3001                              | $\nu(1^{\text{st}} \text{CH}_3)$      |
| 2972                               | $\nu(2^{\text{nd}} \text{CH}_3)$   | 2987                              | $\nu_a(2^{\text{nd}} \text{CH}_3)$    |
| 2957                               | $\nu(1^{\text{st}} \text{CH}_3)$   | 2939                              | $\nu(2^{\text{nd}} \text{CH}_3)$      |
| 2952                               | $\nu_a(2^{\text{nd}} \text{CH}_3)$ | 2613                              | $\nu(1^{\text{st}} \text{CH}_3)$      |
| 2931                               | $\nu(\text{CH})$                   | 1513                              | $\delta_a(1^{\text{st}} \text{CH}_3)$ |
| 1454                               | $\delta_a(\text{both CH}_3)$       | 1435                              | $\delta_a(2^{\text{nd}} \text{CH}_3)$ |
| 1441                               | $\delta_a(\text{both CH}_3)$       | 1393                              | $\delta_a(2^{\text{nd}} \text{CH}_3)$ |
| 1439                               | $\delta_a(\text{both CH}_3)$       | 1386                              | $\delta_s(\text{both CH}_3)$          |
| 1416                               | $\delta_a(\text{both CH}_3)$       | 1359                              | $\delta_s(2^{\text{nd}} \text{CH}_3)$ |
| 1369                               | $\delta_s(\text{both CH}_3)$       | 1319                              | $\delta_a(1^{\text{st}} \text{CH}_3)$ |
| 1350                               |                                    | 1115                              |                                       |
| 1277                               |                                    | 1056                              | $\nu_a(\text{both CC})$               |
| 1153                               |                                    | 973                               |                                       |
| 1081                               |                                    | 940                               | $\nu_a(\text{both CC})$               |
| 1076                               | $\nu_a(\text{both CC})$            | 926                               |                                       |
| 933                                |                                    | 871                               | $\nu_s(\text{both CC})$               |
| 900                                |                                    |                                   |                                       |
| 880                                |                                    |                                   |                                       |
| 853                                | $\nu_s(\text{both CC})$            |                                   |                                       |

**Table S12.** Computed vibrational frequencies of CH\*, CH<sub>3</sub>C\* and CH<sub>3</sub>CH<sub>2</sub>C\* adsorbed on the Ru(111) surface. ( $\nu$ ,  $\delta$ ,  $\rho$ ,  $\omega$ , and  $\tau$  represent the mode of stretching, scissoring, rocking, wagging and twisting, respectively, the subscript of a and s represent the asymmetric and symmetric modes, respectively.)

| HC*  | Mode                | CH <sub>3</sub> C* | Mode                    | CH <sub>3</sub> CH <sub>2</sub> C* | Mode                    |
|------|---------------------|--------------------|-------------------------|------------------------------------|-------------------------|
| 2985 | $\nu(\text{CH})$    | 3039               | $\nu(\text{CH}_3)$      | 3084                               | $\nu(\text{CH}_3)$      |
| 709  | $\delta(\text{CH})$ | 3013               | $\nu(\text{CH}_3)$      | 3055                               | $\nu_a(\text{CH}_3)$    |
| 672  | $\delta(\text{CH})$ | 2978               | $\nu(\text{CH}_3)$      | 3031                               | $\nu_s(\text{CH}_3)$    |
|      |                     | 1432               | $\delta_a(\text{CH}_3)$ | 3009                               | $\nu_s(\text{CH}_2)$    |
|      |                     | 1427               | $\delta_a(\text{CH}_3)$ | 2990                               | $\nu_a(\text{CH}_2)$    |
|      |                     | 1324               | $\Delta_s(\text{CH}_3)$ | 1467                               | $\delta_a(\text{CH}_3)$ |
|      |                     | 1036               | $\nu(\text{CC})$        | 1460                               | $\delta_a(\text{CH}_3)$ |
|      |                     | 971                |                         | 1424                               | $\delta(\text{CH}_2)$   |
|      |                     | 967                |                         | 1370                               | $\delta_s(\text{CH}_3)$ |
|      |                     |                    |                         | 1277                               |                         |
|      |                     |                    |                         | 1241                               |                         |
|      |                     |                    |                         | 1059                               | $\nu(\text{near CC})$   |
|      |                     |                    |                         | 1037                               |                         |
|      |                     |                    |                         | 1035                               | $\nu(\text{far CC})$    |
|      |                     |                    |                         | 917                                | $\nu_s(\text{both CC})$ |
|      |                     |                    |                         | 769                                |                         |

**Table S13.** Computed vibrational frequencies of CH<sub>2</sub>\*CH<sub>2</sub>\* and CH<sub>3</sub>CH\*CH<sub>2</sub>\* adsorbed on the Ru(111) surface. ( $\nu$ ,  $\delta$ ,  $\rho$ ,  $\omega$ , and  $\tau$  represent the mode of stretching, scissoring, rocking, wagging and twisting, respectively, the subscript of a and s represent the asymmetric and symmetric modes, respectively.)

| CH <sub>2</sub> *CH <sub>2</sub> * | Mode                                                | CH <sub>3</sub> CH*CH <sub>2</sub> * | Mode                                     |
|------------------------------------|-----------------------------------------------------|--------------------------------------|------------------------------------------|
| 3141                               | $\nu_a(\text{far CH}_2)$                            | 3097                                 | $\nu_s(\text{CH}_3)$<br>$\nu(\text{CH})$ |
| 3094                               | $\nu_s(\text{far CH}_2)$                            | 3087                                 | $\nu(\text{CH}_3)$                       |
| 2815                               | $\nu_a(\text{near CH}_2)$                           | 3042                                 | $\nu_a(\text{CH}_3)$<br>$\nu(\text{CH})$ |
| 2796                               | $\nu_s(\text{near CH}_2)$                           | 2972                                 | $\nu(\text{CH}_3)$                       |
| 1433                               | $\delta(\text{far CH}_2)$<br>$\nu(\text{CC})$       | 2777                                 | $\nu(\text{CH}_2)$                       |
| 1311                               | $\delta(\text{near CH}_2)$<br>$\nu(\text{CC})$      | 2675                                 | $\nu(\text{CH}_2)$                       |
| 1179                               |                                                     | 1455                                 | $\delta_a(\text{CH}_3)$                  |
| 1109                               | $\nu(\text{CC})$                                    | 1439                                 | $\delta_a(\text{CH}_3)$                  |
| 1030                               | $\omega(\text{near CH}_2)$<br>$\nu(\text{Metal-C})$ | 1373                                 | $\delta_s(\text{CH}_3)$                  |
| 903                                | $\omega(\text{far CH}_2)$<br>$\nu(\text{CC})$       | 1350                                 |                                          |
| 898                                |                                                     | 1290                                 |                                          |
| 752                                |                                                     | 1171                                 |                                          |
| 666                                | $\rho(\text{both CH}_2)$ group                      | 1148                                 | $\nu_a(\text{both CC})$                  |
|                                    |                                                     | 1079                                 |                                          |
|                                    |                                                     | 1020                                 |                                          |
|                                    |                                                     | 990                                  |                                          |
|                                    |                                                     | 894                                  | $\nu_s(\text{both CC})$                  |
|                                    |                                                     | 841                                  |                                          |
|                                    |                                                     | 731                                  |                                          |

**Table S14.** Computed vibrational frequencies of CH<sub>2</sub>\*CH\*, CH<sub>3</sub>CH\*CH\*, and CH<sub>3</sub>C\*CH<sub>2</sub>\* adsorbed on the Ru(111) surface. ( $\nu$ ,  $\delta$ ,  $\rho$ ,  $\omega$ , and  $\tau$  represent the mode of stretching, scissoring, rocking, wagging and twisting, respectively, the subscript of a and s represent the asymmetric and symmetric modes, respectively.)

| CH <sub>2</sub> *CH* | Mode                                      | CH <sub>3</sub> CH*CH* | Mode                                          | CH <sub>3</sub> C*CH <sub>2</sub> * | Mode                    |
|----------------------|-------------------------------------------|------------------------|-----------------------------------------------|-------------------------------------|-------------------------|
| 3125                 | $\nu_a(\text{CH}_2)$                      | 3100                   | $\nu(\text{centre CH})$                       | 3034                                | $\nu(\text{CH}_3)$      |
|                      |                                           |                        |                                               |                                     | $\nu(\text{CH}_2)$      |
| 3084                 | $\nu_s(\text{CH}_2)$                      | 3059                   | $\nu(\text{CH}_3)$                            | 3034                                | $\nu_s(\text{CH}_3)$    |
|                      |                                           |                        |                                               |                                     | $\nu(\text{CH}_2)$      |
| 2100                 | $\nu(\text{CH})$<br>$\nu(\text{Metal-H})$ | 3029                   | $\nu(\text{CH}_3)$                            | 3015                                | $\nu_s(\text{CH}_3)$    |
| 1424                 | $\delta(\text{CH}_2)$                     | 2985                   | $\nu(\text{CH}_3)$                            | 2984                                | $\nu(\text{CH}_3)$      |
| 1304                 |                                           | 2067                   | $\nu(\text{end CH})$<br>$\nu(\text{Metal-H})$ | 2297                                | $\nu(\text{CH}_2)$      |
| 1179                 | $\nu(\text{CC})$                          | 1456                   | $\delta_a(\text{CH}_3)$                       | 1456                                | $\delta(\text{CH}_2)$   |
| 978                  |                                           | 1441                   | $\delta_a(\text{CH}_3)$                       | 1438                                | $\delta_a(\text{CH}_3)$ |
| 888                  | $\omega(\text{CH}_2)$                     | 1368                   | $\delta_s(\text{CH}_3)$                       | 1421                                | $\delta_a(\text{CH}_3)$ |
| 718                  |                                           | 1351                   |                                               | 1361                                | $\delta_a(\text{CH}_3)$ |
| 652                  |                                           | 1325                   |                                               | 1214                                | $\nu(\text{near CC})$   |
|                      |                                           | 1198                   | $\nu(\text{near CC})$                         | 1104                                |                         |
|                      |                                           | 1054                   |                                               | 1023                                |                         |
|                      |                                           | 1010                   |                                               | 980                                 |                         |
|                      |                                           | 925                    | $\nu(\text{far CC})$                          | 908                                 | $\nu_s(\text{both CC})$ |
|                      |                                           | 783                    |                                               | 844                                 |                         |
|                      |                                           | 723                    |                                               | 732                                 | $\rho(\text{CH}_2)$     |

**Table S15.** Computed vibrational frequencies of CH<sub>3</sub>C\* and CH<sub>3</sub>CHC\*, HC\*C\* and CH<sub>3</sub>C\*C\* adsorbed on the Ru(111) surface. ( $\nu$ ,  $\delta$ ,  $\rho$ ,  $\omega$ , and  $\tau$  represent the mode of stretching, scissoring, rocking, wagging and twisting, respectively, the subscript of a and s represent the asymmetric and symmetric modes, respectively.)

| CH <sub>2</sub> C* | Mode                  | CH <sub>3</sub> CHC* | Mode                                             | HC*C* | Mode                | CH <sub>3</sub> C*C* | Mode                    |
|--------------------|-----------------------|----------------------|--------------------------------------------------|-------|---------------------|----------------------|-------------------------|
| 3130               | $\nu_a(\text{CH}_2)$  | 3072                 | $\nu(\text{CH}_3)$<br>$\nu(\text{CH})$           | 3102  | $\nu(\text{CH})$    | 3091                 | $\nu_s(\text{CH}_3)$    |
| 3071               | $\nu_s(\text{CH}_2)$  | 3068                 | $\nu_s(\text{CH}_3)$<br>$\nu(\text{CH})$         | 1207  | $\nu(\text{CC})$    | 3071                 | $\nu_a(\text{CH}_3)$    |
| 1417               | $\delta(\text{CH}_2)$ | 3048                 | $\nu(\text{CH}_3)$<br>$\nu(\text{CH})$           | 913   |                     | 3024                 | $\nu_s(\text{CH}_3)$    |
| 1247               | $\nu(\text{CC})$      | 2988                 | $\nu(\text{CH}_3)$                               | 753   | $\delta(\text{CH})$ | 1445                 | $\delta_a(\text{CH}_3)$ |
| 973                | $\rho(\text{CH}_2)$   | 1452                 | $\delta_a(\text{CH}_3)$                          |       |                     | 1435                 | $\delta_a(\text{CH}_3)$ |
| 869                | $\omega(\text{CH}_2)$ | 1440                 | $\delta_a(\text{CH}_3)$                          |       |                     | 1361                 | $\delta_s(\text{CH}_3)$ |
| 632                | $\tau(\text{CH}_2)$   | 1367                 | $\delta_s(\text{CH}_3)$<br>$\nu(\text{near CC})$ |       |                     | 1323                 | $\nu_s(\text{both CC})$ |
|                    |                       | 1352                 | $\nu_s(\text{both CC})$                          |       |                     | 1030                 |                         |
|                    |                       | 1231                 | $\nu(\text{near CC})$                            |       |                     | 973                  |                         |
|                    |                       | 1059                 |                                                  |       |                     | 912                  | $\nu_s(\text{both CC})$ |
|                    |                       | 1016                 |                                                  |       |                     |                      |                         |
|                    |                       | 915                  | $\nu(\text{far CC})$                             |       |                     |                      |                         |
|                    |                       | 794                  |                                                  |       |                     |                      |                         |

**Table S16.** Computed vibrational frequencies of CH\*CH\*, CH<sub>3</sub>CCH\*, and C\*C\* adsorbed on the Ru(111) surface. ( $\nu$ ,  $\delta$ ,  $\rho$ ,  $\omega$ , and  $\tau$  represent the mode of stretching, scissoring, rocking, wagging and twisting, respectively, the subscript of a and s represent the asymmetric and symmetric modes, respectively.)

| HC*CH* | Mode               | CH <sub>3</sub> C*CH* | Mode                          | C*C* | Mode       |
|--------|--------------------|-----------------------|-------------------------------|------|------------|
| 3053   | $\nu$ (CH)         | 3073                  | $\nu$ (CH <sub>3</sub> )      | 1230 | $\nu$ (CC) |
| 3022   | $\nu$ (CH)         | 3041                  | $\nu$ (CH <sub>3</sub> )      |      |            |
| 1085   | $\nu$ (CC)         | 3019                  | $\nu$ (CH <sub>3</sub> )      |      |            |
| 852    |                    | 2999                  | $\nu$ (CH)                    |      |            |
| 849    |                    | 1446                  | $\delta_a$ (CH <sub>3</sub> ) |      |            |
| 765    | $\delta$ (both CH) | 1437                  | $\delta_a$ (CH <sub>3</sub> ) |      |            |
|        |                    | 1355                  | $\delta_s$ (CH <sub>3</sub> ) |      |            |
|        |                    | 1161                  | $\delta_s$ (both CC)          |      |            |
|        |                    | 1077                  |                               |      |            |
|        |                    | 978                   |                               |      |            |
|        |                    | 960                   |                               |      |            |
|        |                    | 819                   | $\delta_s$ (both CC)          |      |            |
|        |                    | 812                   |                               |      |            |

## References

- 1 C. K. Ande, S. D. Elliott and W. M. M. Kessels, *J. Phys. Chem. C*, 2014, **118**, 26683-26694.
- 2 Y. Urashima, T. Wakabayashi, T. Masaki and Y. Terasaki, *Mineral. J.*, 1974, **7**, 438-444.
